# Supplementary material for: Transparent TiO2 thin films with high photocatalytic activity for indoor air purification
Source: Royal Society of Chemistry journal article supplement (doi:10.1039/d2ra06488j), 2022-01-01
Supplement: d2ra06488j1.pdf [file d2ra06488j1.pdf]

Electronic Supplementary Material (ESI) for RSC Advances.  
This journal is © The Royal Society of Chemistry 2022

## Transparent TiO<sub>2</sub> thin films with high photocatalytic activity for indoor air purification

Jekaterina Sydorenko <sup>a\*</sup>, Arvo Mere <sup>a</sup>, Malle Krunks <sup>a</sup>, Marina Krichevskaya <sup>b</sup> and Ilona Oja Acik <sup>a</sup>

<sup>a</sup> Laboratory of Thin Films Chemical Technologies, Department of Materials and Environmental Technology, Tallinn University of Technology, Ehitajate tee 5, 19086 Tallinn, Estonia.

<sup>b</sup> Laboratory of Environmental Technology, Department of Materials and Environmental Technology, Tallinn University of Technology, Ehitajate tee 5, 19086 Tallinn, Estonia

\* Corresponding authors: Jekaterina Sydorenko email: jekaterina.spiridono@taltech.ee, Marina Krichevskaya email: marina.kritsevskaja@taltech.ee, Ilona Oja Acik email: ilona.oja@taltech.ee.

### Supplementary Information Section

#### Content

|                                                                                                                  |     |
|------------------------------------------------------------------------------------------------------------------|-----|
| 1. Spray pyrolysis setup .....                                                                                   | S2  |
| 2. Setup used for gas-phase photocatalytic experiments.....                                                      | S2  |
| 3. Surface morphology .....                                                                                      | S3  |
| 4. Quantum efficiency calculations .....                                                                         | S3  |
| 5. Langmuir-Hinshelwood reaction kinetics .....                                                                  | S4  |
| 6. Reynolds number calculations.....                                                                             | S4  |
| 7. The comparative table of photocatalytic oxidation of heptane and toluene on TiO <sub>2</sub> thin films ..... | S6  |
| 8. Conversion of compounds in 9 ppm of mixture under different operating parameters.....                         | S9  |
| References.....                                                                                                  | S10 |

## 1. Spray pyrolysis setup

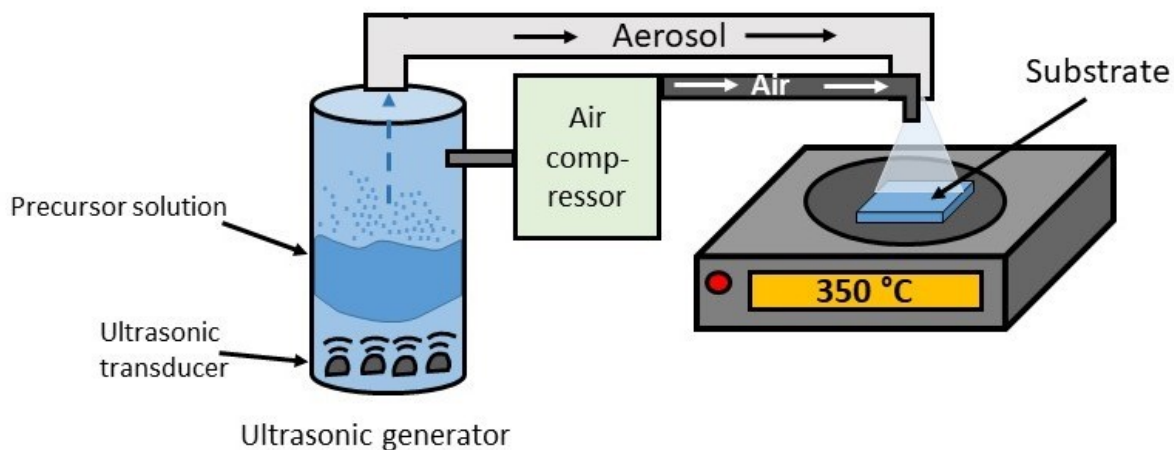

Fig. SI-1 The scheme of the ultrasonic spray pyrolysis setup.

## 2. Setup used for gas-phase photocatalytic experiments.

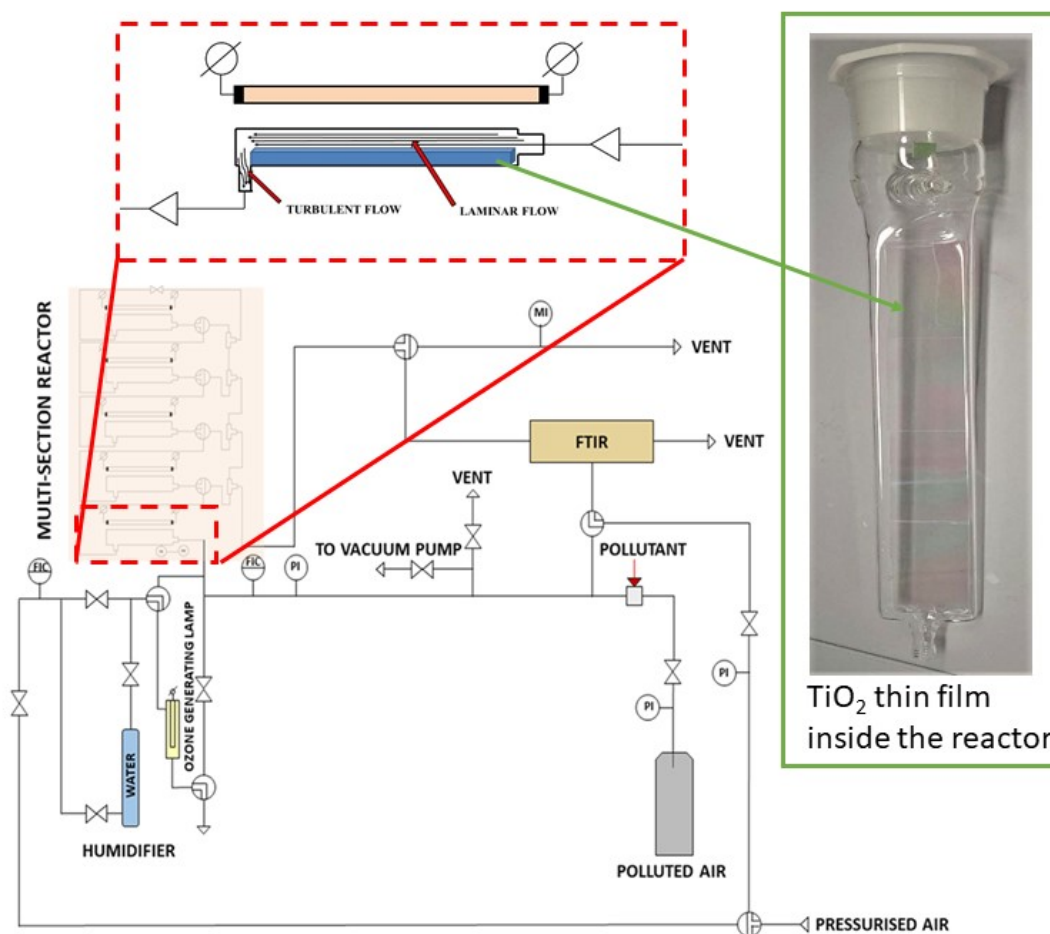

Fig. SI-2 The scheme of setup used for gas-phase photocatalytic experiments.

### 3. Surface morphology

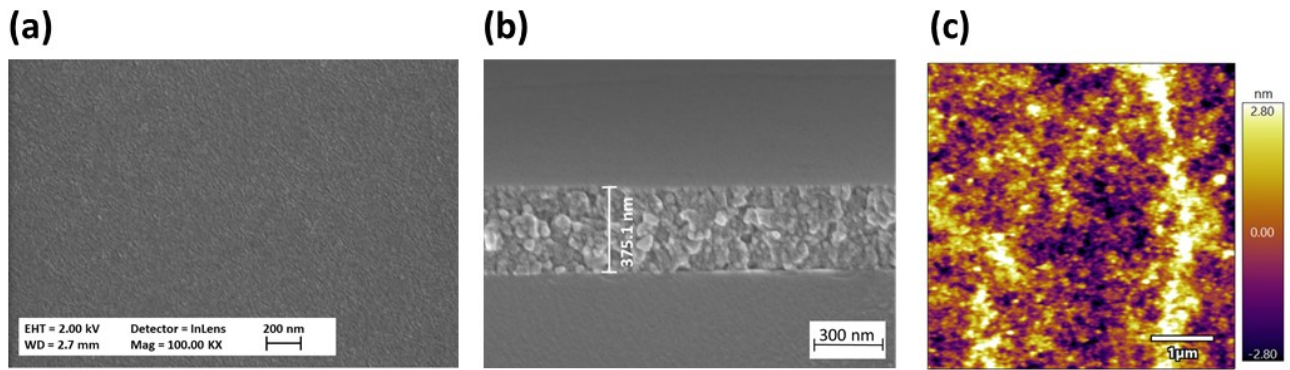

**Fig. SI-3** Scanning electron microscopy (SEM) (a), cross-sectional SEM (b) and atomic force microscopy (AFM) (c) images of TiO<sub>2</sub> film.

### 4. Quantum efficiency calculations

$$QE = \frac{\text{Number of degraded molecules}}{\text{Number of incident photons}}$$

$$\text{Number of degraded molecules per second} = \frac{G * A * r_o}{V_M}$$

Where G – Gas flow rate: G=0.5 L/min=0.0083 L/s

A – Avogadro number: A= 6.02 · 10<sup>23</sup>

$r_o$  – Initial reaction rate:  $r_o = -\frac{dC}{dt}$  For example, at heptane initial concentration 5 ppm  
 $r_o = 0.34 \text{ ppm per } 1 \text{ s} = 0.34 \cdot 10^{-6} \text{ mol / mol air}$

$V_M$  – Molar volume of ideal gas:  $V_M = 22.4 \text{ L/mol air}$

$$\text{Number of degraded molecules per second} = \frac{0.0083 \cdot 6.02 \cdot 10^{23} \cdot 0.34 \cdot 10^{-6}}{22.4} = 7.58 \cdot 10^{13} \text{ 1/s}$$

Number of incident photons per second:

$$\text{Number of incident photons} = \frac{\text{Energy of the lamp}}{\text{Energy of photons}} = \frac{0.42}{5.442 \cdot 10^{-19}} = 7.72 \cdot 10^{17} \text{ 1/s}$$

Energy of the lamp = Irradiated surface area · Irradiance · Time = 120 · 3.5 · 10<sup>-3</sup> · 1 = 0.42 J/s

Where irradiated surface area for one section of the reactor is 120 cm<sup>2</sup>

Irradiance of the UV-A lamp is 3.5 mW/cm<sup>2</sup> = 3.5 · 10<sup>-3</sup> W/cm<sup>2</sup>

$$\text{Photon energy: } E = \frac{hc}{\lambda} = \frac{6.626 \cdot 10^{-34} \text{ J}\cdot\text{s} \cdot 299792458 \text{ m/s}}{3.65 \cdot 10^{-7} \text{ m}} = 5.442 \cdot 10^{-19} \text{ J,}$$

Where h – is the Planck constant: h=6.626 · 10<sup>-34</sup> J·s

c – is the speed of the light in vacuum: c=299792458 m/s

$\lambda$  – is the photon's wavelength for UV-A lamps:  $\lambda=3.65 \cdot 10^{-7}$  m

Quantum efficiency for 5 ppm heptane degradation at air flow rate 0.5 L/min and RH 6%

$$QE = \frac{7.58 \cdot 10^{13}}{7.72 \cdot 10^{17}} = 9.82 \cdot 10^{-5} \text{ molecules / photons}$$

## 5. Langmuir-Hinshelwood reaction kinetics

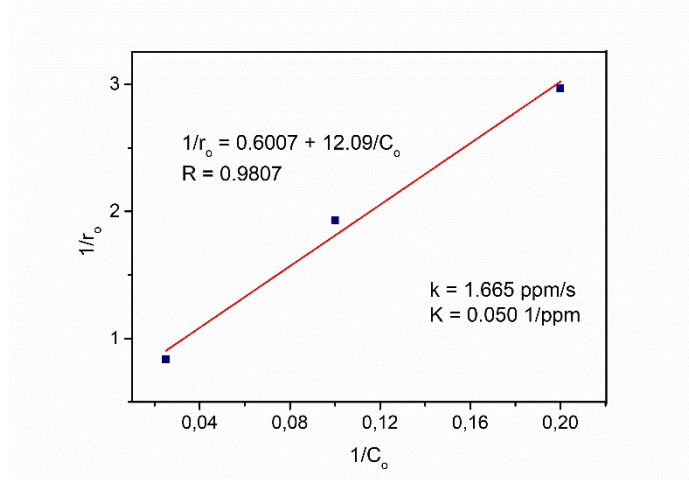

**Fig. SI-4** Langmuir-Hinshelwood kinetic plot for the determination of heptane degradation reaction rate and adsorption constants.

## 6. Reynolds number calculations

To determine the flow pattern Reynolds number calculations were performed.

When  $Re < 2300$  flow is laminar.

When  $2300 < Re < 4000$  transient.

When  $Re > 4000$  turbulent.

Reynolds number was found:

$$Re = \frac{\rho v L}{\mu} \quad S1$$

Where  $\rho$  – density of air,  $kg/m^3$  for air at  $T = 40^\circ C$   $\rho = 1.127 \text{ kg/m}^3$

$v$  – flow speed of air, m/s

$L$  – characteristic linear dimension of the reactor, m

$\mu$  - dynamic viscosity of air, Pa·s for air at  $T = 40^\circ C$   $\mu = 19.07 \cdot 10^{-6} \text{ Pa}\cdot\text{s}$

$$L = \frac{4 A_{cross}}{P}$$

Where  $A_{cross}$  – cross-section area

P – wetting perimeter

For used in the study reactor  $A_{cross} = 4.32 \text{ cm}^2$  and  $P = 10.16 \text{ cm}$

$$L = \frac{4 \cdot 4.32}{10.16} = 1.7 \text{ cm} = 0.017 \text{ m}$$

At air flow rate 0.5 L/min:

$$v = \frac{\text{air flow rate}}{A_{cross}} = \frac{500 \frac{\text{cm}^3}{\text{min}}}{4.32 \text{ cm}} = 115.74 \frac{\text{cm}}{\text{min}} = 0.0193 \frac{\text{m}}{\text{s}}$$

$$Re = \frac{1.127 \cdot 0.0193 \cdot 0.017}{19.07 \cdot 10^{-6}} = 19.39$$

At air flow rate 1 L/min:

$$v = 0.0386 \frac{\text{m}}{\text{s}}$$

$$Re = \frac{1.127 \cdot 0.0386 \cdot 0.017}{19.07 \cdot 10^{-6}} = 38.78$$

At air flow rate 1.5 L/min:

$$v = 0.0578 \frac{\text{m}}{\text{s}}$$

$$Re = \frac{1.127 \cdot 0.0578 \cdot 0.017}{19.07 \cdot 10^{-6}} = 58.14$$

At air flow rate 2 L/min:

$$v = 0.0772 \frac{\text{m}}{\text{s}}$$

$$Re = \frac{1.127 \cdot 0.0772 \cdot 0.017}{19.07 \cdot 10^{-6}} = 77.52$$

At air flow rate 2.5 L/min:

$$v = 0.0965 \frac{\text{m}}{\text{s}}$$

$$Re = \frac{1.127 \cdot 0.0965 \cdot 0.017}{19.07 \cdot 10^{-6}} = 96.90$$

## 7. The comparative table of photocatalytic oxidation of heptane and toluene on TiO<sub>2</sub> thin films

**Table SI-1.** The comparative table of photocatalytic oxidation of heptane and toluene on TiO<sub>2</sub> thin films prepared in current study and on other thin films available from the scientific literature.

| <i>Photocatalyst</i>                                   | <i>Thickness</i> | <i>Pollutant</i> | <i>Initial Concentration</i> | <i>Reactor</i>          | <i>Catalyst surface area</i> | <i>Light source</i>          | <i>Oxidation conditions</i>     | <i>Conversion/degradation rate</i> | <i>Reaction time</i> | <i>Ref</i>     |
|--------------------------------------------------------|------------------|------------------|------------------------------|-------------------------|------------------------------|------------------------------|---------------------------------|------------------------------------|----------------------|----------------|
| Spray pyrolysis-synthesized TiO <sub>2</sub> thin film | 370 nm           | Heptane          | 10 ppm                       | Continuous flow reactor | 360 cm <sup>2</sup>          | UV-A, 3.5 mW/cm <sup>2</sup> | Air flow rate 0.5 L/min, RH 6%  | 100%                               | 46.8 s               | This study     |
| Spray pyrolysis-synthesized TiO <sub>2</sub> thin film | 370 nm           | Heptane          | 10 ppm                       | Continuous flow reactor | 600 cm <sup>2</sup>          | UV-A, 3.5 mW/cm <sup>2</sup> | Air flow rate 0.5 L/min, RH 40% | 91%                                | 78 s                 | This study     |
| Spray pyrolysis-synthesized TiO <sub>2</sub> thin film | 370 nm           | Heptane          | 10 ppm                       | Continuous flow reactor | 600 cm <sup>2</sup>          | VIS, 3.3 mW/cm <sup>2</sup>  | Air flow rate 0.5 L/min, RH 6%  | 44%                                | 78 s                 | This study     |
| Spray pyrolysis-synthesized TiO <sub>2</sub> thin film | 200 nm           | Heptane          | 10 ppm                       | Continuous flow reactor | 600 cm <sup>2</sup>          | UV-A, 3.5 mW/cm <sup>2</sup> | Air flow rate 0.5 L/min, RH 6%  | 48%                                | 78 s                 | S <sup>2</sup> |
| Spray pyrolysis-synthesized TiO <sub>2</sub> thin film | 200 nm           | Heptane          | 10 ppm                       | Continuous flow reactor | 600 cm <sup>2</sup>          | UV-A, 3.5 mW/cm <sup>2</sup> | Air flow rate 0.5 L/min, RH 40% | 20%                                | 78 s                 | S <sup>2</sup> |
| Spray pyrolysis-                                       | 370 nm           | Toluene          | 10 ppm                       | Continuous              | 600 cm <sup>2</sup>          | UV-A, 3.5                    | Air flow rate                   | 55%                                | 78 s                 | This           |

|                                                                                   |              |         |            |                                    |                     |                               |                                              |                                                               |       |                |
|-----------------------------------------------------------------------------------|--------------|---------|------------|------------------------------------|---------------------|-------------------------------|----------------------------------------------|---------------------------------------------------------------|-------|----------------|
| synthesized TiO <sub>2</sub> thin film                                            |              |         |            | flow reactor                       |                     | mW/cm <sup>2</sup>            | 0.5 L/min, RH 6%                             |                                                               |       | study          |
| Spray pyrolysis-synthesized TiO <sub>2</sub> thin film                            | 370 nm       | Toluene | 10 ppm     | Continuous flow reactor            | 600 cm <sup>2</sup> | UV-A, 3.5 mW/cm <sup>2</sup>  | Air flow rate 0.5 L/min, RH 40%              | 51%                                                           | 78 s  | This study     |
| Spray pyrolysis-synthesized TiO <sub>2</sub> thin film                            | 370 nm       | Toluene | 10 ppm     | Continuous flow reactor            | 600 cm <sup>2</sup> | VIS, 3.3 mW/cm <sup>2</sup>   | Air flow rate 0.5 L/min, RH 6%               | 6%                                                            | 78 s  | This study     |
| Sol-gel dip-coated TiO <sub>2</sub> thin film                                     | 470 nm       | Toluene | 192 ppm    | Batch 0.55 L recirculating reactor | 20 cm <sup>2</sup>  | UV-A, 4W                      | Recirculation flow rate 0.075 L/min, Dry air | 60%                                                           | 2 h   | S <sup>3</sup> |
| Sol-gel dip-coated Ti <sub>0.90</sub> Zr <sub>0.10</sub> O <sub>2</sub> thin film | 540 nm       | Toluene | 192 ppm    | Batch 0.55 L recirculating reactor | 20 cm <sup>2</sup>  | UV-A, 4W                      | Recirculation flow rate 0.075 L/min, Dry air | 70%                                                           | 2 h   | S <sup>3</sup> |
| Sol-gel dip-coated 10% ZrO <sub>2</sub> /TiO <sub>2</sub> thin film               | 410 nm       | Toluene | 192 ppm    | Batch 0.55 L recirculating reactor | 20 cm <sup>2</sup>  | UV-A, 4W                      | Recirculation flow rate 0.075 L/min, Dry air | 50%                                                           | 2 h   | S <sup>3</sup> |
| Sol-gel dip-coated TiO <sub>2</sub> thin film                                     | Not reported | Toluene | 50-180 ppm | Batch 1.1 L reactor                | 68 cm <sup>2</sup>  | UV-LED, 10 mW/cm <sup>2</sup> | Dry air                                      | 1.83 x 10 <sup>-4</sup> mol m <sup>-3</sup> min <sup>-1</sup> | 1 h   | S <sup>4</sup> |
| Sol-gel dip-coated 0.7% Fe-TiO <sub>2</sub> thin film                             | Not measured | Toluene | 50-180 ppm | Batch 1.1 L reactor                | 68 cm <sup>2</sup>  | UV-LED, 10 mW/cm <sup>2</sup> | Dry air                                      | 2.57 x 10 <sup>-4</sup> mol m <sup>-3</sup> min <sup>-1</sup> | 1 h   | S <sup>4</sup> |
| Sol-gel dip-coated                                                                | 0.9 μm       | Toluene | 1 ppm      | Continuous                         | 50 cm <sup>2</sup>  | UV-A, 1                       | Air flow rate                                | 46%                                                           | 0.2 s | S <sup>5</sup> |

|                                                                               |        |         |         |                                        |                       |                                     |                                        |     |           |    |
|-------------------------------------------------------------------------------|--------|---------|---------|----------------------------------------|-----------------------|-------------------------------------|----------------------------------------|-----|-----------|----|
| TiO <sub>2</sub> thin film                                                    |        |         |         | flow reactor                           |                       | mW/cm <sup>2</sup>                  | 0.5 L/min, RH<br>50%                   |     |           |    |
| Sol-gel dip coated<br>TiO <sub>2</sub> thin film                              | 350 nm | Toluene | 155 ppb | Benchtop<br>continuous<br>flow reactor | 1.2 cm <sup>2</sup>   | UV-C, 3.0<br>mW/cm <sup>2</sup>     | Air flow rate<br>0.5 L/min, dry<br>air | 78% | 1 s       | S6 |
| Sol-gel dip coated<br>TiO <sub>2</sub>                                        | 1.3 μm | Toluene | 0.5 ppm | Continuous<br>flow tubular<br>reactor  | 184 cm <sup>2</sup>   | UV-A,<br>10W                        | Air flow rate<br>0.2 L/min, dry<br>air | 95% | 25 s      | S7 |
| Sol-gel dip coated<br>porphyrin-<br>sensitized TiO <sub>2</sub> thin<br>films | 1.3 μm | Toluene | 0.5 ppm | Continuous<br>flow tubular<br>reactor  | 184 cm <sup>2</sup>   | VIS, 10W                            | Air flow rate<br>0.2 L/min, dry<br>air | 15% | 25 s      | S7 |
| E-beam evaporated<br>TiO <sub>2</sub> thin films                              | 20 nm  | Toluene | 5 ppm   | Batch 0.314 L<br>reactor               | 18.75 cm <sup>2</sup> | UV-A,<br>0.304<br>W/cm <sup>2</sup> | Water vapour<br>atmosphere             | 40% | 30<br>min | S8 |



### 8. Conversion of compounds in 9 ppm of mixture under different operating parameters

**Table SI-2.** Conversion of compounds in 9 ppm of mixture heptane, acetone and acetaldehyde (3 ppm each compound) under different operating parameters at different photocatalytic surface areas. *AD* – acetaldehyde, *AC* – acetone and *HEP* - heptane

| Operating parameters  |                       |             | Conversion (%)                          |           |            |                                         |           |            |                                         |           |            |                                         |           |            |                                         |           |            |
|-----------------------|-----------------------|-------------|-----------------------------------------|-----------|------------|-----------------------------------------|-----------|------------|-----------------------------------------|-----------|------------|-----------------------------------------|-----------|------------|-----------------------------------------|-----------|------------|
| Air flow rate (L/min) | Relative humidity (%) | Irradiation | Surface of catalyst 120 cm <sup>2</sup> |           |            | Surface of catalyst 240 cm <sup>2</sup> |           |            | Surface of catalyst 360 cm <sup>2</sup> |           |            | Surface of catalyst 480 cm <sup>2</sup> |           |            | Surface of catalyst 600 cm <sup>2</sup> |           |            |
|                       |                       |             | <i>AD</i>                               | <i>AC</i> | <i>HEP</i> |
| 0.5                   | 6                     | UV-A        | 100                                     | 93        | 77         | 100                                     | 99        | 92         | 100                                     | 100       | 100        | 100                                     | 100       | 100        | 100                                     | 100       | 100        |
| 1                     | 6                     | UV-A        | 63                                      | 63        | 56         | 86                                      | 84        | 81         | 92                                      | 91        | 90         | 100                                     | 100       | 100        | 100                                     | 100       | 100        |
| 0.5                   | 40                    | UV-A        | 46                                      | 31        | 30         | 65                                      | 55        | 48         | 83                                      | 76        | 67         | 100                                     | 87        | 77         | 100                                     | 100       | 82         |
| 0.5                   | 6                     | VIS         | 39                                      | 33        | 15         | 51                                      | 53        | 26         | 71                                      | 71        | 40         | 87                                      | 85        | 59         | 100                                     | 100       | 78         |

**Table SI-3.** Conversion of compounds in 9 ppm of mixture toluene, acetone and acetaldehyde (3 ppm each compound) under different operating parameters at different photocatalytic surface areas. *AD* – acetaldehyde, *AC* – acetone and *TOL* – toluene

| Operating parameters  |                       |             | Conversion (%)                          |           |            |                                         |           |            |                                         |           |            |                                         |           |            |                                         |           |            |
|-----------------------|-----------------------|-------------|-----------------------------------------|-----------|------------|-----------------------------------------|-----------|------------|-----------------------------------------|-----------|------------|-----------------------------------------|-----------|------------|-----------------------------------------|-----------|------------|
| Air flow rate (L/min) | Relative humidity (%) | Irradiation | Surface of catalyst 120 cm <sup>2</sup> |           |            | Surface of catalyst 240 cm <sup>2</sup> |           |            | Surface of catalyst 360 cm <sup>2</sup> |           |            | Surface of catalyst 480 cm <sup>2</sup> |           |            | Surface of catalyst 600 cm <sup>2</sup> |           |            |
|                       |                       |             | <i>AD</i>                               | <i>AC</i> | <i>TOL</i> |
| 0.5                   | 6                     | UV-A        | 78                                      | 70        | 71         | 100                                     | 100       | 97         | 100                                     | 100       | 100        | 100                                     | 100       | 100        | 100                                     | 100       | 100        |
| 1                     | 6                     | UV-A        | 40                                      | 40        | 48         | 61                                      | 60        | 67         | 82                                      | 81        | 85         | 91                                      | 86        | 100        | 100                                     | 93        | 100        |
| 0.5                   | 40                    | UV-A        | 40                                      | 32        | 37         | 65                                      | 51        | 65         | 78                                      | 68        | 70         | 88                                      | 81        | 78         | 100                                     | 100       | 90         |
| 0.5                   | 6                     | VIS         | 20                                      | 24        | 16         | 21                                      | 25        | 28         | 33                                      | 34        | 28         | 36                                      | 38        | 29         | 52                                      | 53        | 31         |

## References

- S1 C. Geankoplis, *Transport processes and unit operations*, 3rd edn., 1993, 921.
- S2 I. Dundar, M. Krichevskaya, A. Katerski, M. Krunks and I. O. Acik, *Catalysts*, 2019, **9**, 915, DOI:10.3390/catal9110915.
- S3 M. D. Hernández-Alonso, I. Tejedor-Tejedor, J. M. Coronado and M. A. Anderson, *Appl. Catal. B Environ.*, 2011, **101**, 283-293, DOI:10.1016/j.apcatb.2010.09.029.
- S4 T. Rojviroon, A. Laobuthee and S. Sirivithayapakorn, *Int. J. Photoenergy*, 2012, **8**, DOI:10.1155/2012/898464.
- S5 N. Negishi, S. Matsuzawa, K. Takeuchi and P. Pichat, *Chem. Mater.*, 2007, **19**, 3808-3814, DOI:10.1021/cm070320i.
- S6 N. Quici, M. L. Vera, H. Choi, G. L. Puma, D. D. Dionysiou, M. I. Litter and H. Destailats, *Appl. Catal. B Environ.*, 2010, **95**, 312-319, DOI:10.1016/j.apcatb.2010.01.009.
- S7 P. C. Yao, S. T. Hang, C. W. Lin and D. H. Hai, *J. Taiwan Inst. Chem. Eng.*, 2011, **42**, 470-479, DOI:10.1016/j.jtice.2010.08.013.
- S8 C. Garlisi and G. Palmisano, *Appl. Surf. Sci.*, 2017, **420**, 89-93, DOI:10.1016/j.apsusc.2017.05.077.
